# Supplementary material for: l-Cysteine modified metal–organic framework as a chiral stationary phase for enantioseparation by capillary electrochromatography
Source: Royal Society of Chemistry journal article supplement (doi:10.1039/d1ra07909c), 2022-01-01
Supplement: d1ra07909c1.pdf [file d1ra07909c1.pdf]

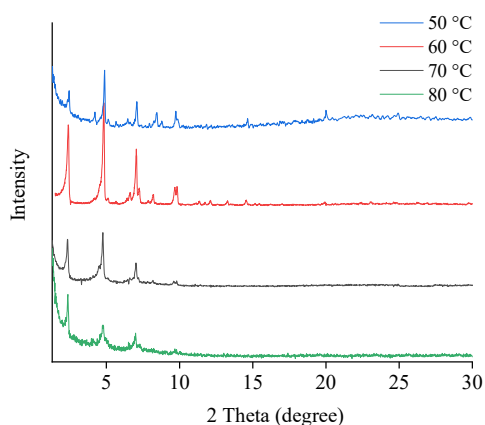

Figure S1 XRD pattern of L-Cys-PCN-222 synthesized under the different reaction temperature when the molar ratio of PCN-222 to L-Cys was 1 : 10.

Table S1 Binding ratio of  $Zr_6$  to L-Cys in L-Cys-PCN-222 synthesized at the different molar ratio of PCN-222 to L-Cys when the synthesis temperature of L-Cys-PCN-222 was 60 °C.

| Molar ratio of PCN-222 to L-Cys | Element | Peak BE | Atomic % | Binding ratio of $Zr_6$ to L-Cys |
|---------------------------------|---------|---------|----------|----------------------------------|
| 1 : 1                           | C       | 291.08  | 67.46    | 1 : 2.0                          |
|                                 | O       | 536.08  | 22.7     |                                  |
|                                 | Zr      | 188.08  | 2.84     |                                  |
|                                 | N       | 407.58  | 6.06     |                                  |
|                                 | S       | 174.98  | 0.94     |                                  |
| 1 : 5                           | C       | 291.58  | 68.71    | 1 : 3.4                          |
|                                 | O       | 536.58  | 21.57    |                                  |
|                                 | Zr      | 191.08  | 2.62     |                                  |
|                                 | N       | 410.08  | 5.61     |                                  |
|                                 | S       | 174.58  | 1.5      |                                  |
| 1 : 10                          | C       | 283.82  | 70.05    | 1 : 3.8                          |
|                                 | O       | 530.8   | 19.2     |                                  |
|                                 | Zr      | 182.32  | 3.14     |                                  |
|                                 | N       | 398.74  | 5.65     |                                  |
|                                 | S       | 162.89  | 1.97     |                                  |
| 1 : 15                          | C       | 286     | 69.9     | 1 : 3.8                          |
|                                 | O       | 535.8   | 19.3     |                                  |
|                                 | Zr      | 189     | 3.19     |                                  |
|                                 | N       | 401     | 5.7      |                                  |
|                                 | S       | 165     | 2        |                                  |
